# Supplementary material for: Pharmacokinetic Similarity and Comparative Pharmacodynamics, Safety, Efficacy, and Immunogenicity of DRL_RI Versus Reference Rituximab in Biologics-Naïve Patients with Moderate-to-Severe Rheumatoid Arthritis: A Double-Blind, Randomized, Three-Arm Study
Source: PubMed Central journal article supplement — BioDrugs. 2020 Feb 12;34(2):183–96. doi: 10.1007/s40259-020-00406-1 (PMC7113224; doi:10.1007/s40259-020-00406-1), 2020-02-12
Supplement: 40259_2020_406_MOESM1_ESM.pdf [file 40259_2020_406_MOESM1_ESM.pdf]

**Pharmacokinetic Similarity and Comparative Pharmacodynamics, Safety, Efficacy, and Immunogenicity of DRL\_RI With Reference Rituximab in Biologics-Naïve Patients With Moderate-to-Severe Rheumatoid Arthritis: A Double-blind, Randomized, 3-arm Study**

**Author names (Full names, address, and affiliations of all authors)**

Vikram Muralidhar Haridas,<sup>1</sup> Rahul Katta,<sup>2</sup> Ajit Nalawade,<sup>3</sup> Sandeep Kharkar,<sup>4</sup> Vyacheslav Zhdan,<sup>5</sup> Olena Garmish,<sup>6</sup> Luis Lopez-Lazaro,<sup>7</sup> Sonica Sachdeva Batra,<sup>8</sup> Suresh Kankanwadi<sup>9</sup>

<sup>1</sup>Sushruta Multispeciality Hospital, Hubballi, India [haridasvikram@yahoo.co.in](mailto:haridasvikram@yahoo.co.in) ORCID ID: 0000-0003-2607-2013

<sup>2</sup>Katta Hospital, S.R. Kalla Memorial General Hospital, Jaipur, India <rahulkatta@hotmail.com>

<sup>3</sup>Inamdar Multispecialty Hospital, Pune, India <drajitrnalawade1975@gmail.com>

<sup>4</sup>CARE Hospital, Panchasheel, India <drsandeep2k@yahoo.com>

<sup>5</sup>M.V.Sklifosovskyi Poltava Regional Hospital, Poltava, Ukraine <vyacheslav.zhdan@i.ua>

<sup>6</sup>SI NSC M.D. Strazhesko Inst.Cardiology, NAMSU, Kiev, Ukraine <garmish.elena@gmail.com>

<sup>7</sup> Head, Clinical Sciences, Dr. Reddy's Laboratories Ltd., Elisabethenanlage 11, Basel 4051, Switzerland [llopezlazaro@drreddys.com](mailto:llopezlazaro@drreddys.com); ORCID-ID 0000-0003-0620-6133

<sup>8</sup>Head, Medical Sciences, Dr. Reddy's Laboratories Ltd., Bachupally, Hyderabad 500090, India Hyderabad, India [sonicabatra@drreddys.com](mailto:sonicabatra@drreddys.com); ORCID ID 0000-0003-3220-6567

<sup>9</sup>Head, Development, Biologics, Dr. Reddy's Laboratories Ltd., Elisabethenanlage 11, Basel 4051, Switzerland [sureshkankanwadi@drreddys.com](mailto:sureshkankanwadi@drreddys.com); ORCID ID 0000-0002-2267-2778

**Name, Contact number, and email of corresponding author:**

Luis Lopez-Lazaro, +41 61 271 4754<[llopezlazaro@drreddys.com](mailto:llopezlazaro@drreddys.com)>

## Detailed List Exclusion Criteria

**Table S1 Exclusion Criteria**

- 
- Prior therapy with alkylating agents or azathioprine; other biologics including rituximab and biologic disease modifying anti-rheumatic drugs (DMARDs); or leflunomide therapy within 3 months of screening
  - Patients receiving double/triple DMARDs with azathioprine, Leflunomide, or any agent requiring more than 4 weeks washout
  - Patients taking high potency opioid analgesics (e.g. methadone, hydromorphone, morphine)
  - Patients who have had any therapy with intra-articular injections (e.g. corticoids) required for a flare up and up to 4 weeks prior to screening
  - Any investigational drug within 30 days or 5 times half-life, whichever was longer, prior to screening
  - Patients requiring vaccination or who were vaccinated at least 4 weeks prior to administration of the study drugs
  - Patients with underlying metabolic, hematologic, renal, hepatic, pulmonary, neurologic, endocrine, infectious, or gastrointestinal conditions, which in the opinion of the Investigator immunocompromised the patient
  - Infection requiring hospitalization, parenteral, antimicrobial therapy, or judged clinically significant by the Investigator within 3 months prior to first dose of study drug
  - Patients with history of or current clinical fibromyalgia or juvenile idiopathic arthritis
  - Patients with secondary Sjogren's syndrome
  - Patients with the laboratory abnormalities in white blood cells, platelets, neutrophils, hemoglobin; serum IgG, IgM, IgA below lower limit of normal (LLN); abnormal liver and renal function tests and any clinically relevant abnormality detected on screening history, physical examination, clinical laboratory, chest X-ray, or electrocardiogram (ECG)
  - Patients with systemic manifestations of rheumatoid arthritis (RA) and RA patients with Functional Status Class IV classified according to the ACR 1991 revised criteria
  - Patients with other inflammatory diseases which might confound the evaluation of the efficacy (e.g. Crohn's disease, ulcerative colitis)
  - Any current illness requiring antibiotics, or symptoms of a resolving illness, within 2 weeks prior to screening
  - Patients with evidence of active, suspected, or inadequately treated tuberculosis, positive serological test for hepatitis B or C or HIV
  - History of cardiovascular disease with New York Heart Association Functional Class II or significant cardiac disease arrhythmias, or history of stroke, or uncontrolled hypertension (systolic blood pressure [BP]  $\geq 160$  mmHg and diastolic BP  $\geq 95$  mmHg)
  - History of lymphoproliferative disease, or organ allograft
  - History of cancer
  - History of allergy or hypersensitivity to any of the compounds used in the study
  - Patients who lost or donated  $\geq 400$  mL blood in the 8 weeks prior to randomization
  - Pregnant or lactating women, or women planning to become pregnant during the study
  - Any condition that prevented compliance, such as history of chronic alcohol or drug abuse, significant mental or nervous disorder or other illness that would, in the Investigators opinion, interfere with compliance with the study requirements or be detrimental to patient safety
- 

Abbreviations:

BP: blood pressure

DMARDs disease modifying anti-rheumatic drugs

HIV Human immunodeficiency virus

LLN Lower limit of normal

mL: milliliter

RA: rheumatoid arthritis

## Sampling Schedule

**Table S2      Pharmacokinetic Sampling Schedule for Rituximab Infusion**

| <b>Infusion</b>              | <b>Time Point†</b>               |                                 |
|------------------------------|----------------------------------|---------------------------------|
| Infusion 1                   | Pre-infusion                     |                                 |
|                              | 3 hours after starting infusion) |                                 |
|                              | End of infusion                  |                                 |
|                              | 1 hour after end of infusion     |                                 |
|                              | 6 hour after end of infusion     |                                 |
|                              | Day 2                            |                                 |
|                              | Day 3                            |                                 |
|                              | Day 8                            |                                 |
|                              | Infusion 2*                      | Pre-infusion                    |
|                              |                                  | 3 hours after starting infusion |
| End of infusion              |                                  |                                 |
| 1 hour after end of infusion |                                  |                                 |
| 6 hour after end of infusion |                                  |                                 |
| Day 2                        |                                  |                                 |
| Day 3                        |                                  |                                 |
| Day 8                        |                                  |                                 |
| Day 15                       |                                  |                                 |
| Week 4                       |                                  |                                 |
| Week 6                       |                                  |                                 |
| Week 8                       |                                  |                                 |
| Week 10                      |                                  |                                 |
| Week 14                      |                                  |                                 |

\*Day 15 after first infusion  
† Time points are relative to infusion

**Table S3      Sampling Schedule for CD 19+ Cell Recovery**

| <b>Infusion</b> | <b>Time Point†</b>              |
|-----------------|---------------------------------|
| Infusion 1      | Pre-infusion                    |
|                 | 3 hours after starting infusion |
|                 | End of infusion                 |
|                 | 6 hour after end of infusion    |
|                 | Day 2                           |
| Infusion 2*     | Pre-infusion                    |
|                 | 6 hour after end of infusion    |
|                 | Day 2                           |
|                 | Day 15                          |
|                 | Week 6                          |
|                 | Week 10                         |
|                 | Week 14                         |
|                 | Week 18                         |
| Week 22         |                                 |

\*Day 15 after first infusion  
† Time points are relative to infusion

## Treatment Compliance

**Table S4 Summary of Rituximab Treatment Compliance (Safety Analysis Population)**

| <b>Compliance</b> | <b>DRL_RI (N = 91)</b> | <b>RTX-US (N = 92)</b> | <b>RTX-EU (N =93)</b> | <b>Total (N = 276)</b> |
|-------------------|------------------------|------------------------|-----------------------|------------------------|
| ≤ 25%, n (%)      | 0                      | 3 (3.3)                | 1 (1.1)               | 4 (1.4)                |
| > 75%, n (%)      | 91 (100.0)             | 89 (96.7)              | 92 (98.9)             | 272 (98.6)             |
| ≥ 95%, n (%)      | 91 (100.0)             | 89 (96.7)              | 92 (98.9)             | 272 (98.6)             |

Abbreviations: RTX-EU = MabThera<sup>®</sup>; RTX-US = Rituxan<sup>®</sup>.

Percentages are based on number of patients within each treatment group under Safety Analysis Population (N).

Total volume infused are categorized.

## Analysis Population

**Table S5 Patient Analysis Population**

| Category                                           | DRL_RI<br>(N=91)<br>n (%) | RTX-US<br>(N=92)<br>n (%) | RTX-EU<br>(N=93)<br>n (%) | Total<br>(N=276)<br>n (%) |
|----------------------------------------------------|---------------------------|---------------------------|---------------------------|---------------------------|
| ITT Population-Efficacy <sup>a</sup>               | 88 (96.7)                 | 87 (94.6)                 | 87 (93.5)                 | 262 (94.9)                |
| Per-Protocol Population-Efficacy                   | 82 (90.1)                 | 81 (88.0)                 | 79 (84.9)                 | 242 (87.7)                |
| Per-Protocol Population (ACR)                      | 82 (90.1)                 | 81 (88.0)                 | 79 (84.9)                 | 242 (87.7)                |
| Per-Protocol Population (DAS28 –CRP)               | 81 (89.0)                 | 81 (88.0)                 | 79 (84.9)                 | 241 (87.3)                |
| Per-Protocol Population (HAQ-DI)                   | 82 (90.1)                 | 81 (88.0)                 | 79 (84.9)                 | 242 (87.7)                |
| Safety Analysis Population                         | 91 (100)                  | 92 (100)                  | 93 (100)                  | 276 (100)                 |
| PK Population(excluding ADA-positive) <sup>b</sup> | 79 (86.8)                 | 73 (79.3)                 | 78 (83.9)                 | 230 (83.3)                |
| PK Population Sensitivity Analysis 1 <sup>c</sup>  | 88 (96.7)                 | 87 (94.6)                 | 85 (91.4)                 | 260 (94.2)                |
| PK Population Sensitivity Analysis 2 <sup>d</sup>  | 73 (80.2)                 | 72 (78.3)                 | 75 (80.6)                 | 220 (79.7)                |
| PD Population for DAS28 – CRP                      | 86 (94.5)                 | 86 (93.5)                 | 85 (91.4)                 | 257 (93.1)                |
| PD Population for B-cell analysis                  | 86 (94.5)                 | 87 (94.6)                 | 86 (92.5)                 | 259 (93.8)                |

Abbreviations: ACR = American College of Rheumatology; ADA = Anti-drug antibody; CRP = C-reactive protein; DAS = Disease activity score; HAQ-DI = Health Assessment Questionnaire Disability Index; ITT = intent-to-treat; LOCF = Last observation carried forward; PD = Pharmacodynamic; PK = Pharmacokinetic; PP = per-protocol; RTX-EU = MabThera<sup>®</sup>; RTX-US = Rituxan<sup>®</sup>.

Percentages were based on the number of randomized patients in the study (N).

<sup>a</sup>All patients in the ITT Population were included in the PP Population, except for those patients excluded because of major protocol deviations having significant impact on the patient safety, data integrity, and efficacy endpoints.

<sup>b</sup>Patients with major protocol deviations (e.g. incomplete study drug administration, missed samples for critical time points, or with confirmed antibodies to study drug) were not included in the PK Population.

<sup>c</sup>Sensitivity Analysis 1 PK Population: This population includes all patients having confirmed ADA positive results and patients only randomized between the two products available at the site at the time

<sup>d</sup>Sensitivity Analysis 2 PK Population: This population excludes both patients only randomized between the two products available at the site at the time and patients having confirmed ADA positive results.

## Prior, Concomitant, and Pre-medication

**Table S6 Summary of Rheumatoid Arthritis Medications-(Safety Analysis Population) Analysis Population**

| <b>ATC Level 1</b>                                                  | <b>DRL_RI</b>   | <b>RTX-US</b>   | <b>RTX-EU</b>   | <b>Total</b>     |
|---------------------------------------------------------------------|-----------------|-----------------|-----------------|------------------|
| <b>ATC Level 3</b>                                                  | <b>(N=91)</b>   | <b>(N=92)</b>   | <b>(N=93)</b>   | <b>(N=276)</b>   |
| <b>Preferred term</b>                                               | <b>n (%)</b>    | <b>n (%)</b>    | <b>n (%)</b>    | <b>n (%)</b>     |
| <b>Number of patients with at least 1 medication reported</b>       | <b>91 (100)</b> | <b>92 (100)</b> | <b>93 (100)</b> | <b>276 (100)</b> |
| <b>Antineoplastic and Immunomodulating agents</b>                   | 91 (100)        | 92 (100)        | 93 (100)        | 276 (100)        |
| <b>Antimetabolites</b>                                              | 91 (100)        | 92 (100)        | 93 (100)        | 276 (100)        |
| Methotrexate                                                        | 90 (98.9)       | 91 (98.9)       | 93 (100)        | 274 (99.3)       |
| Methotrexate sodium                                                 | 2 (2.2)         | 1 (1.1)         | 1 (1.1)         | 4 (1.4)          |
| <b>Immunosuppressants</b>                                           | 7 (7.7)         | 6 (6.5)         | 3 (3.2)         | 16 (5.8)         |
| Leflunomide                                                         | 6 (6.6)         | 6 (6.5)         | 3 (3.2)         | 15 (5.4)         |
| Hydroxychloroquine                                                  | 1 (1.1)         | 0               | 0               | 1 (0.4)          |
| <b>Musculo-skeletal system</b>                                      | 52 (57.1)       | 54 (58.7)       | 60 (64.5)       | 166 (60.1)       |
| <b>Anti-inflammatory and anti-rheumatic products, non-steroidal</b> | 52 (57.1)       | 54 (58.7)       | 60 (64.5)       | 166 (60.1)       |
| Hydroxychloroquine                                                  | 35 (38.5)       | 28 (30.4)       | 29 (31.2)       | 92 (33.3)        |
| Hydroxychloroquine sulfate                                          | 17 (18.7)       | 20 (21.7)       | 21 (22.6)       | 58 (21.0)        |
| Sulfasalazine                                                       | 4 (4.4)         | 4 (4.3)         | 5 (5.4)         | 13 (4.7)         |
| Nimesulide                                                          | 0               | 2 (2.2)         | 4 (4.3)         | 6 (2.2)          |
| Algiril                                                             | 2 (2.2)         | 2 (2.2)         | 1 (1.1)         | 5 (1.8)          |
| Aiacerein                                                           | 1 (1.1)         | 1 (1.1)         | 0               | 2 (0.7)          |
| Glucosamin sulfate/msm                                              | 1 (1.1)         | 0               | 1 (1.1)         | 2 (0.7)          |
| Glucosamine sulfate                                                 | 1 (1.1)         | 1 (1.1)         | 0               | 2 (0.7)          |
| Glucosamine                                                         | 0               | 0               | 1 (1.1)         | 1 (0.4)          |
| Joint ache dn                                                       | 0               | 1 (1.1)         | 0               | 1 (0.4)          |
| Methylsulfonylmethane                                               | 1 (1.1)         | 0               | 0               | 1 (0.4)          |
| Rejoint                                                             | 0               | 0               | 1 (1.1)         | 1 (0.4)          |
| <b>Anti-inflammatory/anti-rheumatic agents in combination</b>       | 1 (1.1)         | 1 (1.1)         | 0               | 2 (0.7)          |
| Enzoflam /03538601/                                                 | 0               | 1 (1.1)         | 0               | 1 (0.4)          |
| Moviz-3d                                                            | 1 (1.1)         | 0               | 0               | 1 (0.4)          |
| <b>Systemic hormonal preparations, excl. sex hormones</b>           | 19 (20.9)       | 9 (9.8)         | 10 (10.8)       | 38 (13.8)        |
| <b>Corticosteroids for systemic use, plain</b>                      | 19 (20.9)       | 9 (9.8)         | 10 (10.8)       | 38 (13.8)        |
| Methylprednisolone acetate                                          | 14 (15.4)       | 6 (6.5)         | 4 (4.3)         | 24 (8.7)         |
| Methylprednisolone                                                  | 3 (3.3)         | 2 (2.2)         | 5 (5.4)         | 10 (3.6)         |
| Prednisolone                                                        | 2 (2.2)         | 1 (1.1)         | 0               | 3 (1.1)          |
| Hydrocortisone                                                      | 0               | 0               | 1 (1.1)         | 1 (0.4)          |
| <b>Alimentary tract and metabolism</b>                              | 13 (14.3)       | 11 (12.0)       | 10 (10.8)       | 34 (12.3)        |
| <b>Intestinal anti-inflammatory agents</b>                          | 13 (14.3)       | 11 (12.0)       | 10 (10.8)       | 34 (12.3)        |
| Sulfasalazine                                                       | 13 (14.3)       | 11 (12.0)       | 10 (10.8)       | 34 (12.3)        |

Abbreviations; ATC = Anatomical Therapeutic Chemical Classification; RTX-EU = MabThera<sup>®</sup>; RTX-US = Rituxan<sup>®</sup>.

Percentages are based on number of patients in each treatment group under Safety Analysis Population (N). Patients with multiple usage of the same medication within the same preferred term are counted only once.



## PK Parameters in the Sensitivity analysis populations

**Table S7 Summary of Key PK Parameters and its Comparison between Treatment Groups (PK Sensitivity Population 1 -including ADA-positive patients- N = 260)**

| Parameter (units)                                     | Treatment | GLS Mean | Statistical Comparisons GLS Mean Ratio (91% CI) (%) |                   |                   |
|-------------------------------------------------------|-----------|----------|-----------------------------------------------------|-------------------|-------------------|
|                                                       |           |          | DRL_RI/<br>RTX-US                                   | DRL_RI/<br>RTX-EU | RTX-US/<br>RTX-EU |
| <b>PK Population – Primary Endpoints</b>              |           |          |                                                     |                   |                   |
| AUC <sub>0-14 days, first infusion</sub><br>(µg·h/mL) | DRL_RI    | 39480    |                                                     |                   |                   |
|                                                       | RTX-US    | 39630    | 99.62                                               | 95.11             | 95.47             |
|                                                       | RTX-EU    | 41510    | (93.86, 105.73)                                     | (89.53, 101.05)   | (89.88, 101.41)   |
| AUC <sub>0-∞, entire course</sub><br>(µg·h/mL)        | DRL_RI    | 142200   |                                                     |                   |                   |
|                                                       | RTX-US    | 143900   | 98.82                                               | 93.14             | 94.25             |
|                                                       | RTX-EU    | 152700   | (91.43, 106.82)                                     | (85.96, 100.93)   | (87.00, 102.11)   |
| AUC <sub>0-t, second infusion</sub><br>(µg·h/mL)      | DRL_RI    | 102000   |                                                     |                   |                   |
|                                                       | RTX-US    | 102700   | 99.31                                               | 93.88             | 94.53             |
|                                                       | RTX-EU    | 108600   | (91.10, 108.27)                                     | (86.01, 102.46)   | (86.59, 103.20)   |
| <b>PK Population – Secondary Endpoints</b>            |           |          |                                                     |                   |                   |
| AUC <sub>0-t, entire course</sub><br>(µg·h/mL)        | DRL_RI    | 141500   |                                                     |                   |                   |
|                                                       | RTX-US    | 142800   | 99.12                                               | 93.41             | 94.25             |
|                                                       | RTX-EU    | 151500   | (91.82, 106.99)                                     | (86.35, 101.05)   | (87.17, 101.90)   |
| C <sub>max, first infusion</sub><br>(µg/mL)           | DRL_RI    | 330.958  |                                                     |                   |                   |
|                                                       | RTX-US    | 318.600  | 103.88                                              | 100.10            | 96.36             |
|                                                       | RTX-EU    | 330.621  | (97.80, 110.33)                                     | (94.15, 106.43)   | (90.65, 102.44)   |
| C <sub>max, second infusion</sub><br>(µg/mL)          | DRL_RI    | 408.550  |                                                     |                   |                   |
|                                                       | RTX-US    | 401.621  | 101.73                                              | 101.50            | 99.78             |
|                                                       | RTX-EU    | 402.517  | (95.75, 108.07)                                     | (95.46, 107.92)   | (93.81, 106.13)   |

Abbreviations: ANOVA = Analysis of variance; AUC<sub>0-14 days</sub> = area under the plasma concentration–time curve from time 0 to day 14; AUC<sub>0-t</sub> = area under the plasma concentration–time curve from time 0 to last quantifiable concentration; AUC<sub>0-∞</sub> = area under the plasma concentration–time curve from time 0 extrapolated to infinite time CI: Confidence interval; C<sub>max</sub> = peak plasma concentration; GLS: Geometric least-squares; PK: Pharmacokinetic; RTX-EU = MabThera®; RTX-US = Rituxan®.

PK Sensitivity Population-1, N = 260 (DRL\_RI, n = 88; RTX-US, n = 87; RTX-EU, n = 85).

The values are back transformed from the log scale.

Results based on an ANOVA model with treatment (DRL\_RI, RTX-US and RTX-EU), ADA status, region, and gender being considered as fixed effects.

**Table S8 Summary of Key PK Parameters and its Comparison between Treatment Groups (PK Sensitivity Population 2 –excluding ADA-positive and patients only randomized between the two products available at the site at the time -, N = 220)**

| Parameter (units)                                     | Treatment | GLS Mean | Statistical Comparisons GLS Mean Ratio (91% CI) (%) |                   |                   |
|-------------------------------------------------------|-----------|----------|-----------------------------------------------------|-------------------|-------------------|
|                                                       |           |          | DRL_RI/<br>RTX-US                                   | DRL_RI/<br>RTX-EU | RTX-US/<br>RTX-EU |
| <b>PK Population – Primary Endpoints</b>              |           |          |                                                     |                   |                   |
| AUC <sub>0-14 days, first infusion</sub><br>(µg.h/mL) | DRL_RI    | 44330    |                                                     |                   |                   |
|                                                       | RTX-US    | 42570    | 104.14                                              | 98.94             | 95.01             |
|                                                       | RTX-EU    | 44810    | (98.14, 110.50)                                     | (93.21, 105.03)   | (89.56, 100.79)   |
| AUC <sub>0-∞, entire course</sub><br>(µg.h/mL)        | DRL_RI    | 168400   |                                                     |                   |                   |
|                                                       | RTX-US    | 163400   | 103.06                                              | 96.24             | 93.38             |
|                                                       | RTX-EU    | 175000   | (94.71, 112.14)                                     | (88.32, 104.87)   | (85.76, 101.68)   |
| AUC <sub>0-t, second infusion</sub><br>(µg.h/mL)      | DRL_RI    | 121500   |                                                     |                   |                   |
|                                                       | RTX-US    | 117200   | 103.69                                              | 96.93             | 93.48             |
|                                                       | RTX-EU    | 125400   | (94.45, 113.83)                                     | (88.29, 106.41)   | (85.12, 102.66)   |
| <b>PK Population – Secondary Endpoints</b>            |           |          |                                                     |                   |                   |
| AUC <sub>0-t, entire course</sub><br>(µg.h/mL)        | DRL_RI    | 165700   |                                                     |                   |                   |
|                                                       | RTX-US    | 160800   | 103.00                                              | 96.55             | 93.74             |
|                                                       | RTX-EU    | 171600   | (94.85, 111.86)                                     | (88.78, 105.01)   | (86.26, 101.86)   |
| C <sub>max, first infusion</sub><br>(µg/mL)           | DRL_RI    | 361.421  |                                                     |                   |                   |
|                                                       | RTX-US    | 333.380  | 108.41                                              | 103.17            | 95.16             |
|                                                       | RTX-EU    | 350.327  | (101.76, 115.50)                                    | (96.80, 109.95)   | (89.35, 101.36)   |
| C <sub>max, second infusion</sub><br>(µg/mL)          | DRL_RI    | 437.014  |                                                     |                   |                   |
|                                                       | RTX-US    | 405.430  | 107.79                                              | 105.16            | 97.56             |
|                                                       | RTX-EU    | 415.577  | (101.23, 114.78)                                    | (98.76, 111.97)   | (91.60, 103.91)   |

Abbreviations: AUC<sub>0-14 days</sub> = area under the plasma concentration–time curve from time 0 to day 14; AUC<sub>0-t</sub> = area under the plasma concentration–time curve from time 0 to last quantifiable concentration; AUC<sub>0-∞</sub> = area under the plasma concentration–time curve from time 0 extrapolated to infinite time. Abbreviations: CI: Confidence interval; C<sub>max</sub> = peak plasma concentration; GLS: Geometric least-squares; PK: Pharmacokinetic; RTX-EU = MabThera®; RTX-US = Rituxan®. PK Sensitivity Population-2, N = 260 (DRL\_RI, n = 73; RTX-US, n = 72; RTX-EU, n = 75). The values are back transformed from the log scale. Results based on an ANOVA model with treatment (DRL\_RI, RTX-US and RTX-US), region, and gender being considered as fixed effects.

**Table S9 Proportion of Patients with B-cell Depletion (PD Population)**

| Visit                                 | DRL_RI<br>(N=86) | RTX-US<br>(N=87)     | RTX-EU<br>(N=86)     |
|---------------------------------------|------------------|----------------------|----------------------|
| <b>20% Below the LLN</b>              |                  |                      |                      |
| 48 hours Post Infusion 1, N evaluable | 80               | 82                   | 82                   |
| 48 Hours Post Infusion 1, %           | 98.8             | 100                  | 100                  |
| Difference (95% CI)                   |                  | -1.3 (-6.75, 3.34)   | -1.3 (-6.75, 3.34)   |
| Week 16, N evaluable                  | 78               | 81                   | 79                   |
| Week 16, %                            | 96.2             | 95.1                 | 100                  |
| Difference (95% CI)                   |                  | 1.1 (-6.40, 8.61)    | -3.8 (-10.71, 1.44)  |
| Week 24, N evaluable                  | 79               | 81                   | 79                   |
| Week 24, %                            | 67.1             | 69.1                 | 78.5                 |
| Difference (95% CI)                   |                  | -2.0 (-16.22, 12.19) | -11.4 (-24.73, 2.50) |
| <b>Below the LOD</b>                  |                  |                      |                      |
| 48 hours Post Infusion 1, N evaluable | 82               | 83                   | 82                   |
| 48 Hours Post Infusion 1, %           | 4.9              | 2.4                  | 3.7                  |
| Difference (95% CI)                   |                  | 2.5 (-4.19, 9.69)    | 1.2 (-5.97, 8.62)    |
| Week 16, N evaluable                  | 80               | 82                   | 79                   |
| Week 16, %                            | 10.0             | 4.9                  | 10.1                 |
| Difference (95% CI)                   |                  | 5.1 (-3.39, 14.13)   | -0.1 (-10.00, 9.70)  |
| Week 24, N evaluable                  | 81               | 81                   | 79                   |
| Week 24, %                            | 0.0              | 3.7                  | 1.3                  |
| Difference (95% CI)                   |                  | -3.7 (-10.33, 1.44)  | -1.3 (-6.83, 3.38)   |

Abbreviations: CI = Confidence interval; LOD = Limit of detection; LLN = Lower limit of normal; PD = Pharmacodynamic; RTX-EU = MabThera®; RTX-US = Rituxan®

B-cell depletion is defined as peripheral B-cell recovery to B-cell counts < LLN or LOD The LLN for B-cell counts in this study is 107.0 cells/ $\mu$ L.

N evaluable Patients with available data for the visit

Proportion (%) = (number of patients with depletion/number of evaluable patients for the visit)\*100.

Difference (95% CI) = Difference in proportion of patients with depletion in DRL\_RI group and RTX-US or RTX-EU.

**Table S10 Mean DAS28-CRP values from Baseline to Week 24 (PP population)**

|                   | Mean $\pm$ SD values    |                         |                         |                         |                         |                         |                         |
|-------------------|-------------------------|-------------------------|-------------------------|-------------------------|-------------------------|-------------------------|-------------------------|
|                   | Baseline                | Week 4                  | Week 8                  | Week 12                 | Week 16                 | Week 20                 | Week 24                 |
| <b>DRL-RI (N)</b> | 6.03 $\pm$ 0.68<br>(82) | 5.03 $\pm$ 0.98<br>(82) | 4.67 $\pm$ 1.04<br>(82) | 4.41 $\pm$ 1.14<br>(80) | 4.15 $\pm$ 1.12<br>(81) | 4.08 $\pm$ 1.13<br>(81) | 4.05 $\pm$ 1.11<br>(81) |
| <b>RTX-US (N)</b> | 5.69 $\pm$ 0.77<br>(81) | 4.81 $\pm$ 0.91<br>(80) | 4.47 $\pm$ 0.96<br>(80) | 4.25 $\pm$ 1.08<br>(80) | 4.19 $\pm$ 1.07<br>(81) | 4.02 $\pm$ 1.13<br>(80) | 3.96 $\pm$ 1.12<br>(81) |
| <b>RTX-EU (N)</b> | 5.75 $\pm$ 0.72<br>(79) | 4.76 $\pm$ 1.01<br>(77) | 4.33 $\pm$ 1.15<br>(77) | 4.01 $\pm$ 1.17<br>(77) | 3.90 $\pm$ 1.17<br>(79) | 3.83 $\pm$ 1.12<br>(79) | 3.82 $\pm$ 1.13<br>(79) |

Abbreviations: DAS28-CRP = Disease activity score (28 joints) – C-reactive protein; RTX-EU = MabThera®; RTX-US = Rituxan®; SD = standard deviation

N = number of patients with available assessment in each treatment arm and visit under PP population.

**Table S11 Incidence of Adverse Events Reported in  $\geq 2\%$  of Patients in any Treatment Group up to Week 24 (Safety Analysis Population)**

| <b>SOC Preferred Term</b>                                   | <b>DRL_RI<br/>(N = 91)<br/>n (%)</b> | <b>RTX-US<br/>(N = 92)<br/>n (%)</b> | <b>RTX-EU<br/>(N = 93)<br/>n (%)</b> | <b>Total<br/>(N =276)<br/>n (%)</b> |
|-------------------------------------------------------------|--------------------------------------|--------------------------------------|--------------------------------------|-------------------------------------|
| Number of Patients with at least 1 AE                       | 33 (36.3)                            | 30 (32.6)                            | 37 (39.8)                            | 100 (36.2)                          |
| <b>Infections and infestations</b>                          |                                      |                                      |                                      |                                     |
| Upper respiratory tract infection                           | 4 (4.4)                              | 3 (3.3)                              | 5 (5.4)                              | 12 (4.3)                            |
| Nasopharyngitis                                             | 2 (2.2)                              | 4 (4.3)                              | 1 (1.1)                              | 7 (2.5)                             |
| Urinary tract infection                                     | 2 (2.2)                              | 2 (2.2)                              | 2 (2.2)                              | 6 (2.2)                             |
| <b>Gastrointestinal disorders</b>                           |                                      |                                      |                                      |                                     |
| Nausea                                                      | 1 (1.1)                              | 2 (2.2)                              | 1 (1.1)                              | 4 (1.4)                             |
| Mouth ulceration                                            | 2 (2.2)                              | 1 (1.1)                              | 0                                    | 3 (1.1)                             |
| Abdominal pain upper                                        | 2 (2.2)                              | 0                                    | 0                                    | 2 (0.7)                             |
| <b>Investigations</b>                                       |                                      |                                      |                                      |                                     |
| Alanine aminotransferase increased                          | 1 (1.1)                              | 2 (2.2)                              | 1 (1.1)                              | 4 (1.4)                             |
| Aspartate aminotransferase increased                        | 0                                    | 2 (2.2)                              | 0                                    | 2 (0.7)                             |
| <b>Musculoskeletal and connective tissue disorders</b>      |                                      |                                      |                                      |                                     |
| Rheumatoid arthritis                                        | 3 (3.3)                              | 1 (1.1)                              | 2 (2.2)                              | 6 (2.2)                             |
| Back Pain                                                   | 0                                    | 0                                    | 2 (2.2)                              | 2 (0.7)                             |
| <b>General disorders and administration site conditions</b> |                                      |                                      |                                      |                                     |
| Pyrexia                                                     | 2 (2.2)                              | 4 (4.3)                              | 3 (3.2)                              | 9 (3.3)                             |
| <b>Respiratory, thoracic and mediastinal disorders</b>      |                                      |                                      |                                      |                                     |
| Cough                                                       | 3 (3.3)                              | 3 (3.3)                              | 3 (3.2)                              | 9 (3.3)                             |
| Throat irritation                                           | 0                                    | 2 (2.2)                              | 1 (1.1)                              | 3 (1.1)                             |
| <b>Blood and lymphatic system disorders</b>                 |                                      |                                      |                                      |                                     |
| Anaemia                                                     | 1 (1.1)                              | 5 (5.4)                              | 1 (1.1)                              | 7 (2.5)                             |
| Neutropenia                                                 | 1 (1.1)                              | 2 (2.2)                              | 1 (1.1)                              | 4 (1.4)                             |
| Eosinophilia                                                | 0                                    | 1 (1.1)                              | 2 (2.2)                              | 3 (1.1)                             |
| <b>Skin and subcutaneous tissue disorders</b>               |                                      |                                      |                                      |                                     |
| Pruritus                                                    | 0                                    | 2 (2.2)                              | 1 (1.1)                              | 3 (1.1)                             |
| Rash                                                        | 0                                    | 1 (1.1)                              | 2 (2.2)                              | 3 (1.1)                             |
| <b>Injury, poisoning and procedural complications</b>       |                                      |                                      |                                      |                                     |
| Infusion related reaction                                   | 1 (1.1)                              | 2 (2.2)                              | 1 (1.1)                              | 4 (1.4)                             |
| <b>Nervous system disorders</b>                             |                                      |                                      |                                      |                                     |
| Headache                                                    | 1 ( 1.1)                             | 1 (1.1)                              | 2 (2.2)                              | 4 (1.4)                             |
| <b>Vascular disorders</b>                                   |                                      |                                      |                                      |                                     |
| Hypertension                                                | 1 (1.1)                              | 0                                    | 2 (2.2)                              | 3 (1.1)                             |

Abbreviations: AE = Adverse event; RTX-EU = MabThera<sup>®</sup>; RTX-US = Rituxan<sup>®</sup>; SOC = System organ class.

| <b>SOC</b>            | <b>DRL_RI</b>   | <b>RTX-US</b>   | <b>RTX-EU</b>   | <b>Total</b>     |
|-----------------------|-----------------|-----------------|-----------------|------------------|
| <b>Preferred Term</b> | <b>(N = 91)</b> | <b>(N = 92)</b> | <b>(N = 93)</b> | <b>(N = 276)</b> |
|                       | <b>n (%)</b>    | <b>n (%)</b>    | <b>n (%)</b>    | <b>n (%)</b>     |

Abbreviations: AE = Adverse event; RTX-EU = MabThera<sup>®</sup>; RTX-US = Rituxan<sup>®</sup>; SOC = System organ class. Patients experiencing multiple events with the same preferred term were counted only once.

Percentages are based on number of patients within each treatment group under safety analysis population (N).

**Table S12 Incidence of Adverse Events Reported in  $\geq 2\%$  of Patients in any Treatment Group up to Week 52 (Safety Analysis Population)**

| <b>SOC Preferred Term</b>                                   | <b>DRL_RI<br/>(N = 91)<br/>n (%)</b> | <b>RTX-US<br/>(N = 92)<br/>n (%)</b> | <b>RTX-EU<br/>(N = 93)<br/>n (%)</b> | <b>Total<br/>(N =276)<br/>n (%)</b> |
|-------------------------------------------------------------|--------------------------------------|--------------------------------------|--------------------------------------|-------------------------------------|
| Number of Patients with at least 1 AE                       | 27 (29.7)                            | 28 (30.4)                            | 29 (31.2)                            | 84 (30.4)                           |
| <b>Investigations</b>                                       |                                      |                                      |                                      |                                     |
| B-lymphocyte count decreased                                | 7 (7.7)                              | 5 (5.4)                              | 8 (8.6)                              | 20 (7.2)                            |
| Alanine aminotransferase increased                          | 0                                    | 2 (2.2)                              | 1 (1.1)                              | 3 (1.1)                             |
| Aspartate aminotransferase increased                        | 0                                    | 2 (2.2)                              | 1 (1.1)                              | 3 (1.1)                             |
| <b>Infections and infestations</b>                          |                                      |                                      |                                      |                                     |
| Upper respiratory tract infection                           | 1 (1.1)                              | 3 (3.3)                              | 1 (1.1)                              | 5 (1.8)                             |
| Body tinea                                                  | 1 (1.1)                              | 0                                    | 2 (2.2)                              | 3 (1.1)                             |
| <b>Musculoskeletal and connective tissue disorders</b>      |                                      |                                      |                                      |                                     |
| Rheumatoid arthritis                                        | 3 (3.3)                              | 1 (1.1)                              | 4 (4.3)                              | 8 (2.9)                             |
| <b>Gastrointestinal disorders</b>                           |                                      |                                      |                                      |                                     |
| Mouth Ulceration                                            | 2 (2.2)                              | 0                                    | 1 (1.1)                              | 3 (1.1)                             |
| <b>Respiratory, thoracic and mediastinal disorders</b>      |                                      |                                      |                                      |                                     |
| Cough                                                       | 0                                    | 2 (2.2)                              | 4 (4.3)                              | 6 (2.2)                             |
| <b>General disorders and administration site conditions</b> |                                      |                                      |                                      |                                     |
| Pyrexia                                                     | 3 (3.3)                              | 1 (1.1)                              | 2 (2.2)                              | 6 (2.2)                             |
| <b>Blood and lymphatic system disorders</b>                 |                                      |                                      |                                      |                                     |
| Anaemia                                                     | 0                                    | 2 (2.2)                              | 1 (1.1)                              | 3 (1.1)                             |
| <b>Vascular disorders</b>                                   |                                      |                                      |                                      |                                     |
| Hypertension                                                | 1 (1.1)                              | 0                                    | 2 (2.2)                              | 3 (1.1)                             |

Abbreviations: AE = Adverse event; RTX-EU = MabThera<sup>®</sup>; RTX-US = Rituxan<sup>®</sup>; SOC = System organ class. Patients experiencing multiple events with the same preferred term were counted only once. Percentages are based on number of patients within each treatment group under safety analysis population (N).

**Table S13 Incidence of Serious Adverse Events up to Week 52 (Safety Analysis Population)**

| <b>SOC Preferred Term</b>                                   | <b>DRL_RI<br/>(N = 91)<br/>n (%)</b> | <b>RTX-US<br/>(N = 92)<br/>n (%)</b> | <b>RTX-EU<br/>(N = 93)<br/>n (%)</b> | <b>Total<br/>(N =276)<br/>n (%)</b> |
|-------------------------------------------------------------|--------------------------------------|--------------------------------------|--------------------------------------|-------------------------------------|
| Number of patients with at least 1 SAE                      | 3 (3.3)                              | 5 (5.4)                              | 10 (10.8)                            | 18 (6.5)                            |
| <b>Infections and infestations</b>                          |                                      |                                      |                                      |                                     |
| H1N1 influenza                                              |                                      |                                      | 1 (1.1)                              | 1 (0.4)                             |
| Pneumonia                                                   | 1 (1.1)                              |                                      |                                      | 1 (0.4)                             |
| Urinary tract infection                                     |                                      |                                      | 1 (1.1)                              | 1 (0.4)                             |
| Cellulitis                                                  |                                      |                                      | 1 (1.1)                              | 1 (0.4)                             |
| Gastroenteritis viral                                       |                                      |                                      | 1 (1.1)                              | 1 (0.4)                             |
| Pyelonephritis acute                                        |                                      |                                      | 1 (1.1)                              | 1 (0.4)                             |
| <b>Injury, poisoning and procedural complications</b>       |                                      |                                      |                                      |                                     |
| Femoral neck fracture                                       |                                      |                                      | 1 (1.1)                              | 1 (0.4)                             |
| Forearm fracture                                            |                                      |                                      | 1 (1.1)                              | 1 (0.4)                             |
| Humerus fracture                                            |                                      | 1 (1.1)                              |                                      | 1 (0.4)                             |
| Infusion related reaction                                   |                                      | 1 (1.1)                              |                                      | 1 (0.4)                             |
| Spinal cord compression fracture                            |                                      | 1 (1.1)                              |                                      | 1 (0.4)                             |
| <b>Blood and lymphatic system disorders</b>                 |                                      |                                      |                                      |                                     |
| Febrile neutropenia                                         |                                      | 1 (1.1)                              |                                      | 1 (0.4)                             |
| Neutropenia                                                 |                                      | 1 (1.1)                              |                                      | 1 (0.4)                             |
| <b>Cardiac disorders</b>                                    |                                      |                                      |                                      |                                     |
| Atrial fibrillation                                         |                                      |                                      | 1 (1.1)                              | 1 (0.4)                             |
| Cardio-respiratory arrest                                   |                                      |                                      | 1 (1.1)                              | 1 (0.4)                             |
| <b>General disorders and administration site conditions</b> |                                      |                                      |                                      |                                     |
| Pyrexia                                                     |                                      |                                      | 1 (1.1)                              | 1 (0.4)                             |
| Sudden death                                                | 2 (2.2)                              |                                      |                                      | 2 (2.2)                             |
| <b>Gastrointestinal disorders</b>                           |                                      |                                      |                                      |                                     |
| Intestinal obstruction                                      |                                      | 1 (1.1)                              |                                      | 1 (0.4)                             |
| <b>Respiratory, thoracic and mediastinal disorders</b>      |                                      |                                      |                                      |                                     |
| Interstitial lung disease                                   |                                      |                                      | 1 (1.1)                              | 1 (0.4)                             |
| <b>Musculoskeletal and connective tissue disorder</b>       |                                      |                                      |                                      |                                     |
| Spondylolisthesis                                           |                                      |                                      | 1 (1.1)                              | 1 (0.4)                             |

Abbreviations: SAE = Serious adverse event; RTX-EU = MabThera®; RTX-US = Rituxan®; SOC = System organ class.  
Patients experiencing multiple events with the same preferred term were counted only once.  
Percentages are based on number of patients within each treatment group under safety analysis population (N).

**Table S14 Proportion of Patients with B-cell Repletion (PD Population)**

| Visit                                    | DRL_RI | RTX-US                 | RTX-EU                |
|------------------------------------------|--------|------------------------|-----------------------|
| <b>Above or equal to the LLN</b>         |        |                        |                       |
| Week 24, N evaluable                     | 81     | 81                     | 79                    |
| Week 24, %                               | 4.9    | 7.4                    | 0                     |
| Difference (95% CI)                      |        | -2.5<br>(-10.85, 5.65) | 4.9<br>(-0.59, 12.02) |
| Week 52, N evaluable                     | 60     | 56                     | 59                    |
| Week 52, %                               | 33.3   | 23.2                   | 23.7                  |
| Difference (95% CI)                      |        | 10.1<br>(-6.31, 25.68) | 9.6<br>(-6.59, 25.12) |
| <b>Above or equal to 80% of baseline</b> |        |                        |                       |
| Week 24, N evaluable                     | 81     | 78                     | 78                    |
| Week 24, %                               | 1.2    | 3.9                    | 0                     |
| Difference (95% CI)                      |        | -2.6<br>(-9.55, 3.38)  | 1.2<br>(-3.57, 6.67)  |
| Week 52, N evaluable                     | 60     | 56                     | 59                    |
| Week 52, %                               | 21.7   | 14.3                   | 6.8                   |
| Difference (95% CI)                      |        | 7.4<br>(-6.91, 21.17)  | 14.9<br>(2.19, 27.53) |

Abbreviations: LLN = Lower limit of normal; PD = Pharmacodynamic; RTX-EU = MabThera®; RTX-US = Rituxan®

B-cell repletion is defined as peripheral B-cell recovery to B-cell counts  $\geq$  LLN or achievement of a B-cell counts at least 80% of the patient's baseline B-cell counts. The LLN for B-cell counts in this study is 107.0 cells/ $\mu$ L

N evaluable Patients with available data for the visit

Proportion (%) = (number of patients with repletion/number of evaluable patients for the visit)\*100.

Difference (95% CI) = Difference in proportion of patients with depletion in DRL\_RI group and RTX-US or RTX-EU.



**Table S15 Summary of Other Secondary PK Parameters (Main PK Population, N = 230)**

| <b>Parameter*</b>                                                     | <b>DRL_RI<br/>(N = 79)</b> | <b>RTX-US<br/>(N = 73)</b> | <b>RTX-EU<br/>(N = 78)</b> |
|-----------------------------------------------------------------------|----------------------------|----------------------------|----------------------------|
| T <sub>max</sub> , first infusion, median (minimum, maximum) (hours)  | 5.25 (3.00, 10.25)         | 5.25 (4.25, 10.33)         | 5.25 (3.00, 29.05)         |
| T <sub>max</sub> , second infusion, median (minimum, maximum) (hours) | 5.25 (3.00, 10.33)         | 5.25 (3.08, 52.00)         | 5.25 (3.00, 27.25)         |
| t <sub>1/2</sub> ; (hours)                                            | 374 (30.1)                 | 378 (25.0)                 | 391 (23.9)                 |
| Cl (L/day)                                                            | 0.254 (33.2)               | 0.254 (33.9)               | 0.238 (30.0)               |
| V <sub>z</sub> (L)                                                    | 5.69 (26.3)                | 5.76 (23.1)                | 5.55 (26.4)                |

Abbreviations: Cl = total body clearance after second infusion; PK = Pharmacokinetic; RTX-EU = MabThera®; RTX-US = Rituxan®; t<sub>1/2</sub> = terminal elimination half-life after second infusion; T<sub>max</sub> = time to peak plasma concentration; V<sub>z</sub> = volume of distribution after second infusion.

\*Values for secondary endpoints parameters are geometric means with geometric coefficient of variation expressed as a percent in parentheses except where indicated otherwise.

**Table S16 ADA Titers up to Week 52 (PP Population)**

|                      | <b>Median (minimum - maximum) ADA Titer</b> |               |                |                |                |
|----------------------|---------------------------------------------|---------------|----------------|----------------|----------------|
|                      | <b>Baseline</b>                             | <b>Week 4</b> | <b>Week 16</b> | <b>Week 24</b> | <b>Week 52</b> |
| <b>DRL_RI (N=82)</b> | 1.0 (1 - 1)                                 | NR            | 8.0 (8 - 8)    | 4.0 (1 - 8)    | 2.0 (1 - 2)    |
| <b>RTX-US (N=81)</b> | NR                                          | NR            | 1.0 (1 - 1)    | 1.0 (1 - 16)   | 2.0 (1 - 16)   |
| <b>RTX-EU (N=79)</b> | NR                                          | NR            | 8.0 (8 - 8)    | 9.0 (1 - 256)  | 1.0 (1 - 8)    |

Abbreviations: ADA = antidrug antibody; NR = not reported (as ADA titer values of less than 1);  
PP = per-protocol; RTX-US = Rituxan<sup>®</sup>; RTX-EU = MabThera<sup>®</sup>.

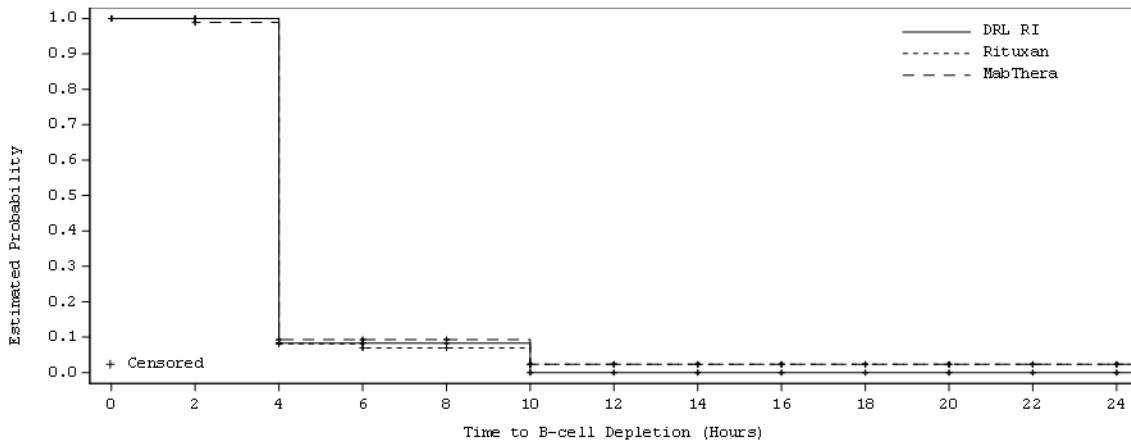

**Fig S1 Kaplan-Meier Analysis of Time to B-cell Depletion (Below 20% of LLN) (PD Population)**

Abbreviations: LLN = Lower limit of normal; PD = Pharmacodynamic; RTX-EU = Mabthera®; RTX-US = Rituxan®.

The confidence intervals are estimated based on the Kaplan-Meier estimation method. Patients who did not experience depletion are censored.

**Peripheral blood B-cell recovery  $\geq$  LLN or at least 80% of baseline B-cell Population**

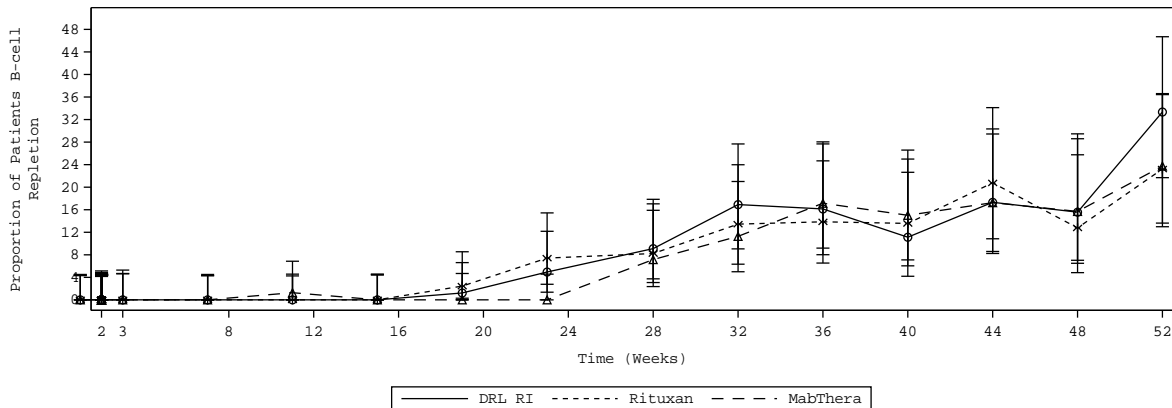

**Fig S2a Proportion of Patients with B-cell Repletion Above or Equal to the Lower Limit of Normal**

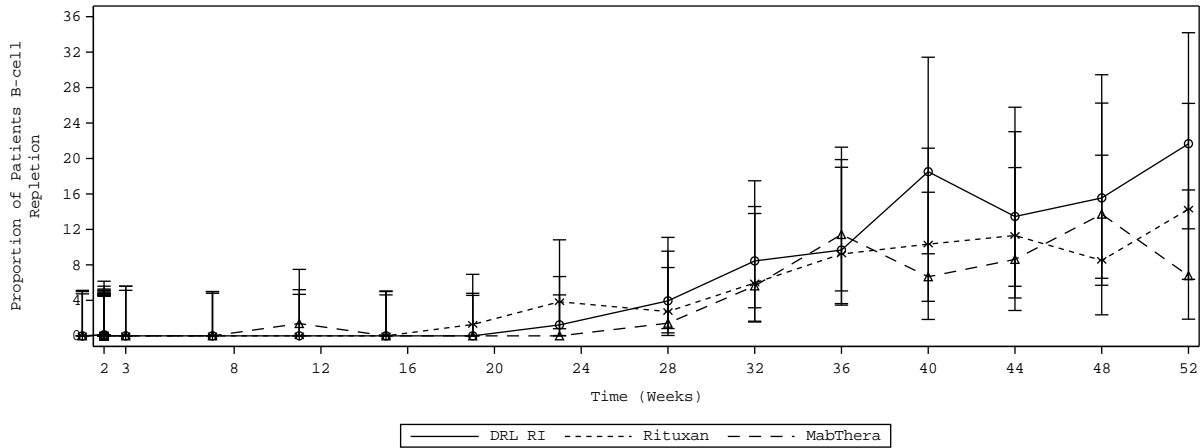

**Fig S2b Proportion of Patients with B-cell Repletion Above or Equal to 80% of Baseline**

Abbreviations: LLN = Lower limit of normal; RTX-EU = Mabthera®; RTX-US = Rituxan®.

B-cell repletion is defined as peripheral B-cell recovery to B-cell counts  $\geq$  LLN B-cell count at least 80% of the patient's baseline B-cell counts. The LLN for B-cell counts in this study is 107.0 cells/ $\mu$ L.

Infusion 1-0 (h): week 0 Day 1 Pre-infusion; Infusion 2-0 (h): week 2 Day 1 pre-infusion, 3700 (h): week 22 respect to infusion 2, Week 24 respect to infusion 1

Upper and lower bounds indicated the 95% confidence interval.

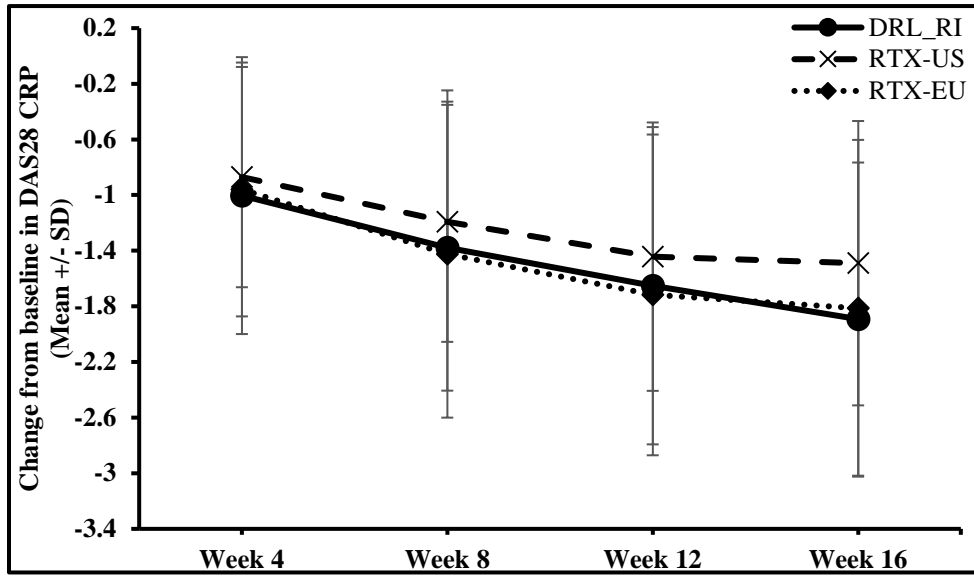

**Figure S3 Change in Mean DAS28-CRP Score from Baseline up to Week 16 (PD population)**

Abbreviations: DAS28-CRP = disease activity score (28 joints) - C-reactive protein; PD = pharmacodynamic; RTX-EU = MabThera®; RTX-US = Rituxan®; SD = standard deviation.

The geometric mean calculation for change from baseline columns are based on the ratio of visit value to baseline value.

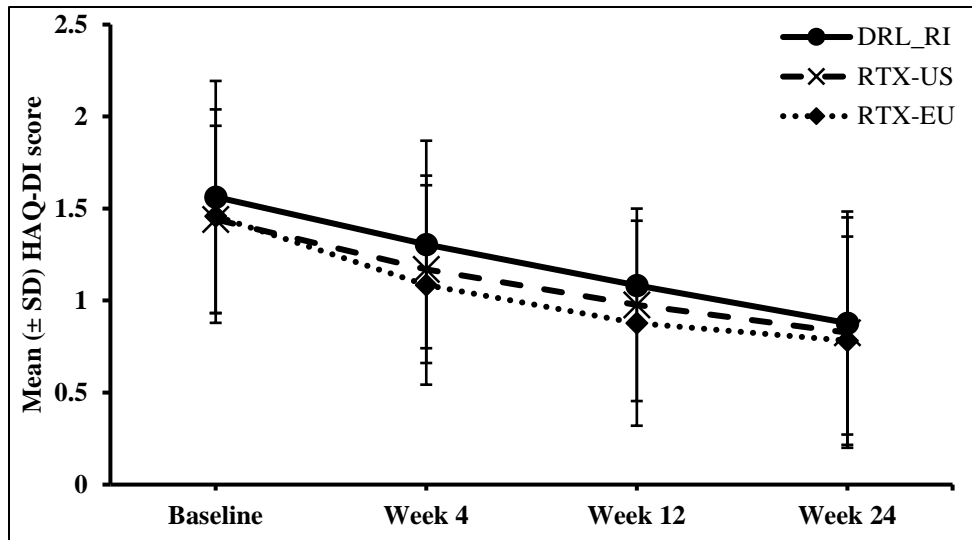

**Figure S4 Mean HAQ-DI Score over 24 Weeks from Baseline (PP Population)**

Abbreviations: HAQ-DI = Health Assessment Questionnaire Disability Index; PP = per-protocol; RTX-EU = MabThera<sup>®</sup>; RTX-US = Rituxan<sup>®</sup>; SD = standard deviation.

The geometric mean calculation for change from baseline columns is based on the ratio of visit value to baseline value.
